# Supplementary material for: Synthesis of thioethers via metal-free reductive coupling of tosylhydrazones with thiols
Source: Royal Society of Chemistry journal article supplement (doi:10.1039/c0ob00639d), 2010-11-17

# **Synthesis of Thioethers *via* Metal-free Reductive Coupling of Tosylhydrazones with Thiols**

Qiuping Ding,\* Banpeng Cao, Jianjun Yuan, Xianjin Liu, and Yiyuan Peng\*

dqpjxnu@gmail.com; yypeng@jxnu.edu.cn

## **Supporting Information**

1. General materials and methods (S2).
2. Characterization data of compound **3** (S2-S8).
3. References (S8)
4. Copies of spectra of compound **3** (S9-S31).

**General Materials and Methods:** All reactions were performed under nitrogen atmosphere. NMR samples were run in CDCl<sub>3</sub> or DMSO and <sup>1</sup>H NMR were referenced to TMS, <sup>13</sup>C NMR were referenced to CDCl<sub>3</sub> (δ = 77.0). All chemical shift values are quoted in ppm and coupling constants quoted in Hz.

**General procedure for metal-free reductive coupling reaction of tosylhydrazone 1 with thiol 2:**

A mixture of tosylhydrazone **1** (0.3 mmol), thiol **2** (0.6 mmol, 2.0 equiv), K<sub>2</sub>CO<sub>3</sub> (0.9 mmol, 3.0 equiv) in dioxane (3.0 mL) was stirred at 110 °C for 24h under N<sub>2</sub>. After completion of the reaction as indicated by TLC, the mixture was cooled to room temperature. After adding ethyl acetate (10 mL), the organic phase was washed with saturated brine, dried with MgSO<sub>4</sub>, and concentrated under reduced vacuum. The residue was then purified by flash chromatography on silica gel to afford product **3**.

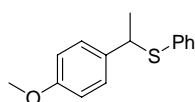

**(1-(4-methoxyphenyl)ethyl)(phenyl)sulfane<sup>1</sup> (3a)** Yield: 93%; Colorless oil; <sup>1</sup>H NMR (400 MHz, CDCl<sub>3</sub>) δ 1.60 (d, *J* = 7.2 Hz, 3H), 3.77 (s, 3H), 4.32 (q, *J* = 6.8 Hz, 1H), 6.80 (d, *J* = 7.2 Hz, 2H), 7.18-7.24 (m, 5H), 7.29 (d, *J* = 8.0 Hz, 2H); <sup>13</sup>C NMR (100 MHz, CDCl<sub>3</sub>) δ 22.5, 47.4, 55.3, 113.8, 127.1, 128.4, 128.7, 132.5, 135.2, 135.3, 158.6.

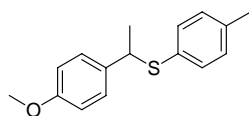

**(1-(4-methoxyphenyl)ethyl)(p-tolyl)sulfane (3b)** Yield: 77%; Colorless oil; <sup>1</sup>H NMR (400 MHz,

$\text{CDCl}_3$ )  $\delta$  1.61 (d,  $J = 6.8$  Hz, 3H), 2.33(s, 3H), 3.81 (s, 3H), 4.29 (q,  $J = 6.8$  Hz, 1H), 6.84 (d,  $J = 8.4$  Hz, 2H), 7.07 (d,  $J = 7.6$  Hz, 2H), 7.21-7.24 (m, 4H);  $^{13}\text{C}$  NMR (100 MHz,  $\text{CDCl}_3$ )  $\delta$  21.1, 22.3, 47.8, 55.3, 113.7, 128.4, 129.5, 131.5, 133.2, 135.4, 137.3, 158.6.

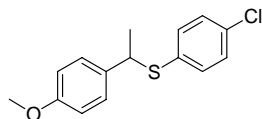

**(4-chlorophenyl)(1-(4-methoxyphenyl)ethyl)sulfane (3c)** Yield: 90%; Colorless oil;  $^1\text{H}$  NMR (400 MHz,  $\text{CDCl}_3$ )  $\delta$  1.50 (d,  $J = 7.2$  Hz, 3H), 3.68 (s, 3H), 4.19 (q,  $J = 6.8$  Hz, 1H), 6.72 (d,  $J = 8.8$  Hz, 2H), 7.09 -7.11 (m, 6H);  $^{13}\text{C}$  NMR (100 MHz,  $\text{CDCl}_3$ )  $\delta$  22.3, 47.7, 55.3, 113.8, 128.4, 128.8, 133.3, 133.7, 133.9, 134.9, 158.7.

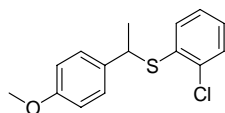

**(2-chlorophenyl)(1-(4-methoxyphenyl)ethyl)sulfane (3d)** Yield: 85%; Colorless oil;  $^1\text{H}$  NMR (400 MHz,  $\text{CDCl}_3$ )  $\delta$  1.62 (d,  $J = 7.2$  Hz, 3H), 3.76 (s, 3H), 4.47 (q,  $J = 6.8$  Hz, 1H), 6.80 (d,  $J = 8.8$  Hz, 2H), 7.08 (d,  $J = 8.8$  Hz, 2H), 7.23-7.28 (m, 3H), 7.35 (t,  $J = 6.4$  Hz, 1H);  $^{13}\text{C}$  NMR (100 MHz,  $\text{CDCl}_3$ ) 22.4, 45.8, 55.3, 113.9, 126.9, 127.8, 128.3, 129.7, 132.7, 134.6, 134.8, 135.8, 158.8.

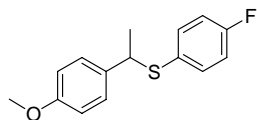

**(4-fluorophenyl)(1-(4-methoxyphenyl)ethyl)sulfane (3e)** Yield: 88%; Colorless oil;  $^1\text{H}$  NMR (400 MHz,  $\text{CDCl}_3$ )  $\delta$  1.57 (d,  $J = 7.2$  Hz, 3H), 3.76 (s, 3H), 4.20 (q,  $J = 6.8$  Hz, 1H), 6.79 (d,  $J = 8.4$  Hz, 2H), 6.89 (t,  $J = 8.4$  Hz, 2H), 7.14 (d,  $J = 8.4$  Hz, 2H), 7.23 (dd,  $J = 5.2, 8.8$  Hz, 2H);  $^{13}\text{C}$  NMR (100 MHz,  $\text{CDCl}_3$ )  $\delta$  22.1, 48.3, 55.2, 113.7, 115.7 (d,  $^2J_{\text{CF}} = 22.0$  Hz), 128.4, 129.9, 135.0,

135.7 (d,  $^2J_{\text{CF}} = 8.0$  Hz), 158.7. 162.5 (d,  $^1J_{\text{CF}} = 246.0$  Hz).

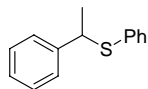

**phenyl(1-phenylethyl)sulfane<sup>1</sup> (3g)** Yield: 68%; Colorless oil;  $^1\text{H}$  NMR (400 MHz,  $\text{CDCl}_3$ )  $\delta$  1.62 (d,  $J = 7.2$  Hz, 3H), 4.33 (q,  $J = 7.2$  Hz, 1H), 7.17-7.29 (m, 10H);  $^{13}\text{C}$  NMR (100 MHz,  $\text{CDCl}_3$ )  $\delta$  22.4, 48.0, 127.1, 127.2, 127.3, 128.4, 128.7, 132.5, 135.2, 143.2.

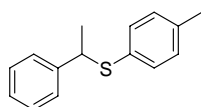

**(1-phenylethyl)(p-tolyl)sulfane (3h)** Yield: 61%; Colorless oil;  $^1\text{H}$  NMR (400 MHz,  $\text{CDCl}_3$ )  $\delta$  1.60 (d,  $J = 7.2$  Hz, 3H), 2.29 (s, 3H), 4.26 (q,  $J = 7.2$  Hz, 1H), 7.02 (d,  $J = 8.0$  Hz, 2H), 7.18 (d,  $J = 8.0$  Hz, 2H), 7.21-7.27 (m, 4H);  $^{13}\text{C}$  NMR (100 MHz,  $\text{CDCl}_3$ )  $\delta$  21.4, 22.2, 48.4, 127.1, 127.3, 128.4, 129.5, 131.3, 133.2, 137.4, 143.4.

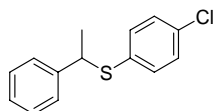

**(4-chlorophenyl)(1-phenylethyl)sulfane<sup>2</sup> (3i)** Yield: 60%; Colorless oil;  $^1\text{H}$  NMR (400 MHz,  $\text{CDCl}_3$ )  $\delta$  1.61 (d,  $J = 7.2$  Hz, 3H), 4.29 (q,  $J = 7.2$  Hz, 1H), 7.17 (s, 4H), 7.18-7.23 (m, 1H), 7.25-7.27 (m, 4H);  $^{13}\text{C}$  NMR (100 MHz,  $\text{CDCl}_3$ )  $\delta$  22.2, 48.3, 127.2, 127.3, 128.5, 128.8, 133.4, 133.5, 134.0, 142.9.

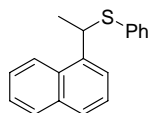

**(1-(naphthalen-1-yl)ethyl)(phenyl)sulfane (3j)** Yield: 50%; Colorless oil;  $^1\text{H}$  NMR (400 MHz,  $\text{CDCl}_3$ )  $\delta$  1.77 (d,  $J = 6.8$  Hz, 3H), 5.16 (q,  $J = 6.8$  Hz, 1H), 7.18-7.24 (m, 3H), 7.29-7.31 (m, 2H), 7.40 (t,  $J = 8.0$  Hz, 1H), 7.48 (t,  $J = 8.0$  Hz, 1H), 7.52-7.58 (m, 2H), 7.74 (d,  $J$

= 8.4 Hz, 1H), 7.86 (d,  $J = 8.0$  Hz, 1H), 8.22 (d,  $J = 8.4$  Hz, 1H);  $^{13}\text{C}$  NMR (100 MHz,  $\text{CDCl}_3$ )  $\delta$  22.1, 42.9, 123.1, 124.3, 125.4, 125.6, 126.1, 127.1, 127.9, 128.8, 129.0, 130.9, 132.2, 134.0, 135.3, 138.2.

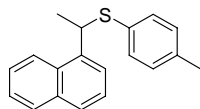

**(1-(naphthalen-1-yl)ethyl)(p-tolyl)sulfane (3k)** Yield: 45%; Colorless oil;  $^1\text{H}$  NMR (400 MHz,  $\text{CDCl}_3$ )  $\delta$  1.75 (d,  $J = 6.8$  Hz, 3H), 2.29 (s, 3H), 5.08 (q,  $J = 6.8$  Hz, 1H), 7.03 (d,  $J = 8.0$  Hz, 2H), 7.21 (d,  $J = 8.0$  Hz, 2H), 7.40 (t,  $J = 7.6$  Hz, 1H), 7.48-7.55 (m, 3H), 7.74 (d,  $J = 8.0$  Hz, 1H), 7.86 (d,  $J = 8.0$  Hz, 1H), 8.23 (d,  $J = 8.8$  Hz, 1H);  $^{13}\text{C}$  NMR (100 MHz,  $\text{CDCl}_3$ )  $\delta$  21.1, 22.0, 43.3, 123.2, 124.3, 125.4, 125.6, 126.1, 127.8, 129.0, 129.5, 130.9, 131.4, 133.1, 134.0, 137.4, 138.4.

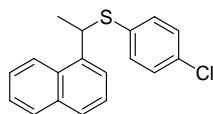

**(4-chlorophenyl)(1-(naphthalen-1-yl)ethyl)sulfane (3l)** Yield: 67%; Colorless oil;  $^1\text{H}$  NMR (400 MHz,  $\text{CDCl}_3$ )  $\delta$  1.75 (d,  $J = 6.8$  Hz, 3H), 5.11 (q,  $J = 6.8$  Hz, 1H), 7.12-7.18 (m, 4H), 7.39 (t,  $J = 8.0$  Hz, 1H), 7.47-7.56 (m, 3H), 7.74 (d,  $J = 8.0$  Hz, 1H), 7.86 (d,  $J = 8.0$  Hz, 1H), 8.18 (d,  $J = 8.4$  Hz, 1H);  $^{13}\text{C}$  NMR (400 MHz,  $\text{CDCl}_3$ )  $\delta$  22.0, 43.1, 123.0, 124.4, 125.4, 125.7, 126.2, 128.1, 128.9, 129.1, 130.8, 133.4, 133.5, 133.7, 134.0, 137.8.

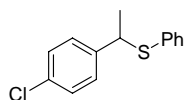

**(1-(4-chlorophenyl)ethyl)(phenyl)sulfane (3m)** Yield: 53%; Colorless oil;  $^1\text{H}$  NMR (400 MHz,  $\text{CDCl}_3$ )  $\delta$  1.59 (d,  $J = 7.2$  Hz, 3H), 4.29 (q,  $J = 7.2$  Hz, 1H), 7.18-7.27 (m, 9H);  $^{13}\text{C}$  NMR (100 MHz,  $\text{CDCl}_3$ )  $\delta$  22.2, 47.5, 127.4, 128.5, 128.6, 128.8, 132.7, 132.8, 134.6, 141.9.

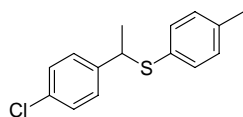

**(1-(4-chlorophenyl)ethyl)(p-tolyl)sulfane (3n)** Yield: 76%; Colorless oil;  $^1\text{H}$  NMR (400 MHz,  $\text{CDCl}_3$ )  $\delta$  1.57 (d,  $J = 7.2$  Hz, 3H), 2.29 (s, 3H), 4.21 (q,  $J = 7.2$  Hz, 1H), 7.02 (d,  $J = 8.0$  Hz, 2H), 7.14-7.23(m, 6H);  $^{13}\text{C}$  NMR (100 MHz,  $\text{CDCl}_3$ )  $\delta$  21.1, 22.1, 47.8, 128.4, 128.7, 129.6, 130.7, 132.6, 133.4, 137.7, 142.0.

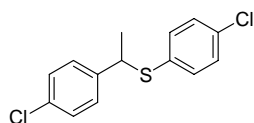

**(4-chlorophenyl)(1-(4-chlorophenyl)ethyl)sulfane (3o)** Yield: 70%; Colorless oil;  $^1\text{H}$  NMR (400 MHz,  $\text{CDCl}_3$ )  $\delta$  1.58 (d,  $J = 6.8$  Hz, 3H), 4.24 (q,  $J = 6.8$  Hz, 1H), 7.15-7.18 (m, 6H), 7.21-7.24 (m, 2H);  $^{13}\text{C}$  NMR (100 MHz,  $\text{CDCl}_3$ )  $\delta$  22.1, 47.7, 128.6 (2C), 128.9, 132.9, 133.0, 133.7, 134.2, 141.5.

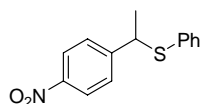

**(1-(4-nitrophenyl)ethyl)(phenyl)sulfane (3p)** Yield: 53%; Colorless oil;  $^1\text{H}$  NMR (400 MHz,  $\text{CDCl}_3$ )  $\delta$  1.65 (d,  $J = 6.8$  Hz, 3H), 4.37 (q,  $J = 6.8$  Hz, 1H), 7.20-7.25 (m, 5H), 7.37 (d,  $J = 8.4$  Hz, 2H), 8.08 (d,  $J = 8.4$  Hz, 2H);  $^{13}\text{C}$  NMR (100 MHz,  $\text{CDCl}_3$ )  $\delta$  21.7, 47.7, 123.6, 127.9, 128.1, 128.9, 133.2, 133.6, 136.5, 151.1.

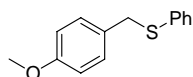

**(4-methoxybenzyl)(phenyl)sulfane<sup>3</sup> (3r)** Yield: 75%; mp: 89-90 °C;  $^1\text{H}$  NMR (400 MHz,  $\text{CDCl}_3$ )  $\delta$  3.77 (s, 3H), 4.07 (s, 2H), 6.81 ((d,  $J = 7.2$  Hz, 2H), 7.16-7.31 (m, 7H);  $^{13}\text{C}$  NMR (100 MHz,  $\text{CDCl}_3$ )  $\delta$  38.5, 55.3, 113.9, 126.3, 128.8, 129.4, 129.8, 130.0, 136.6, 158.8

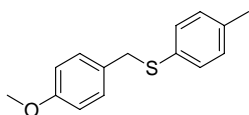

**(4-methoxybenzyl)(p-tolyl)sulfane<sup>4</sup> (3s)** Yield: 85%; mp: 66-68 °C; <sup>1</sup>H NMR (400 MHz, CDCl<sub>3</sub>) δ 2.30 (s, 3H), 3.78 (s, 3H), 4.02 (s, 2H), 6.80 (d, *J* = 8.4 Hz, 2H), 7.06 (d, *J* = 7.6 Hz, 2H), 7.18 (d, *J* = 8.8 Hz, 2H), 7.20 (d, *J* = 8.8 Hz, 2H); <sup>13</sup>C NMR (100 MHz, CDCl<sub>3</sub>) δ 21.1, 39.2, 55.3, 113.9, 129.6, 129.8, 130.0, 130.7, 132.7, 136.5, 158.7.

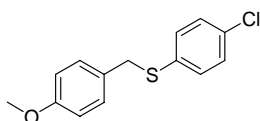

**(4-methoxybenzyl)(4-chlorophenyl)sulfane<sup>4</sup> (3t)** Yield: 72%; mp: 65-66 °C; <sup>1</sup>H NMR (400 MHz, CDCl<sub>3</sub>) δ 3.78 (s, 3H), 4.03 (s, 2H), 6.81 (d, *J* = 8.8 Hz, 2H), 7.18 (d, *J* = 8.8 Hz, 2H), 7.20 (s, 4H); <sup>13</sup>C NMR (100 MHz, CDCl<sub>3</sub>) δ 38.7, 55.3, 114.0, 128.9, 129.0, 129.9, 131.4, 132.4, 134.9, 158.9.

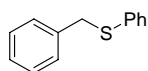

**benzyl(phenyl)sulfane<sup>5</sup> (3u)** Yield: 70%; Colorless oil; <sup>1</sup>H NMR (400 MHz, CDCl<sub>3</sub>) δ 4.11 (s, 2H), 7.15-7.29(m, 10H); <sup>13</sup>C NMR (100 MHz, CDCl<sub>3</sub>) δ 39.1, 126.4, 127.2, 128.5, 128.8, 129.9, 136.4, 137.5.

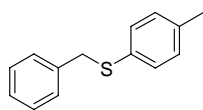

**benzyl(p-tolyl)sulfane<sup>5</sup> (3v)** Yield: 52%; Colorless oil; <sup>1</sup>H NMR (400 MHz, CDCl<sub>3</sub>) δ 2.30 (s, 3H), 4.06 (s, 2H), 7.05 (d, *J* = 8.4 Hz, 2H), 7.20 (d, *J* = 8.4 Hz, 2H), 7.22-7.27(m, 5H); <sup>13</sup>C NMR (100 MHz, CDCl<sub>3</sub>) δ 21.1, 39.8, 127.1, 128.4, 128.9, 129.6, 130.7, 132.5, 136.6, 137.8.

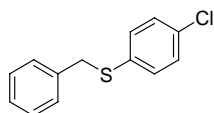

**benzyl(4-chlorophenyl)sulfane**<sup>6</sup> (**3w**) Yield: 61%; mp: 43-44 °C; <sup>1</sup>H NMR (400 MHz, CDCl<sub>3</sub>) δ 4.07 (s, 2H), 7.20 (s, 4H), 7.21-7.26 (m, 5H); <sup>13</sup>C NMR (100 MHz, CDCl<sub>3</sub>) δ 39.3, 127.3, 128.6, 128.8, 129.0, 131.5, 132.5, 134.7, 137.1.

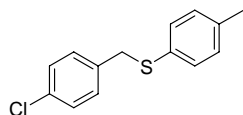

**(4-chlorobenzyl)(p-tolyl)sulfane**<sup>7</sup> (**3x**) Yield: 58%; mp: 64-65 °C; <sup>1</sup>H NMR (400 MHz, CDCl<sub>3</sub>) δ 2.30 (s, 3H), 4.00 (s, 2H), 7.06 (d, *J* = 8.0 Hz, 2H), 7.14 -7.23 (m, 6H); <sup>13</sup>C NMR (100 MHz, CDCl<sub>3</sub>) δ 21.0, 39.2, 128.5, 129.7, 130.1, 131.1, 131.7, 132.8, 136.5, 136.9.

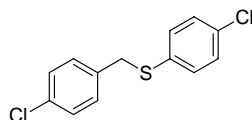

**(4-chlorobenzyl)(4-chlorophenyl)sulfane**<sup>8</sup> (**3y**) Yield: 48%; mp: 56-57 °C; <sup>1</sup>H NMR (400 MHz, CDCl<sub>3</sub>) δ 4.01 (s, 2H), 7.14 -7.25 (m, 8H); <sup>13</sup>C NMR (100 MHz, CDCl<sub>3</sub>) δ 38.8, 128.7, 129.0, 130.1, 131.8, 132.8, 133.1, 134.0, 135.8.

#### References:

1. C. G. Screttas and M. Micha-Screttas, *J. Org. Chem.*, 1979, **44**, 713.
2. N. M. Kolbina, *Zhurnal Organicheskoi Khimii*, 1976, **12**, 1708.
3. T. Itoh and T. Mase, *Org. Lett.*, 2004, **6**, 4587.
4. I. I. Lapkin, *Probl. Organ. Sintez, Akad. Nauk SSSR, Otd. Obshch. I Tekhn. Khim.* 1965, 89.
5. F. G. Bordwell and B. M. Pitt *J. Am. Chem. Soc.*, 1955, **77**, 572.
6. W.-Y. Wu, J.-C. Wang and F.-Y. Tsai, *Green Chem.*, 2009, **11**, 326.
7. R. F. Brookes, N. G. Clark, J. E. Cranham, D. Greenwood, J. R. Marshall and H. A. Stevenson, *J. Sci. Food Agric.* 1958, **9**, 111.
8. J. W. Wong, M. G. Webster, D. Z. Bezabeh, M. J. Hengel, K. K. Ngim, A. J. Krynitsky and S. E. Ebeler, *J. Agric. Food Chem.*, 2004, **52**, 6361



cbp100622-1-1

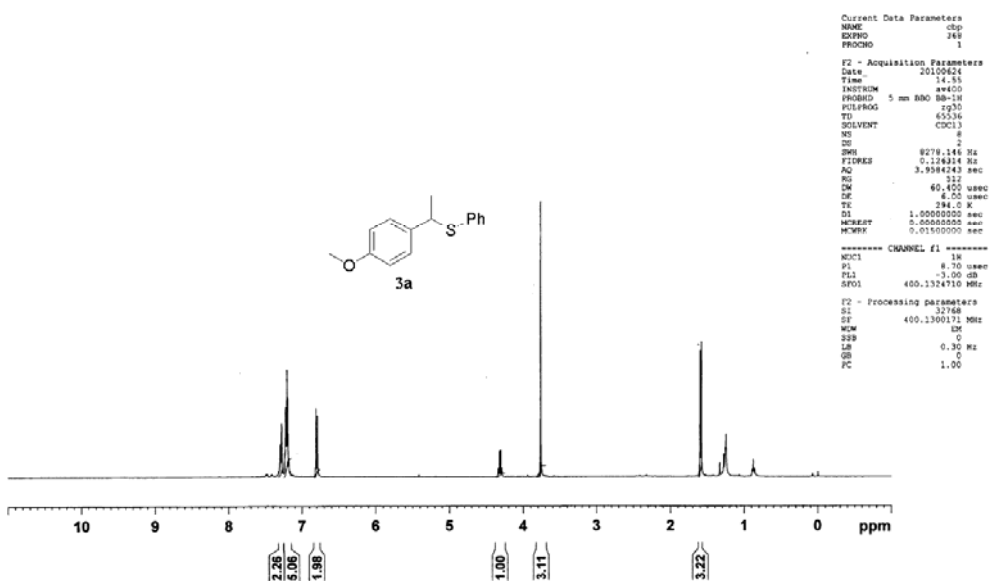

cbp2006100622-1-1 C

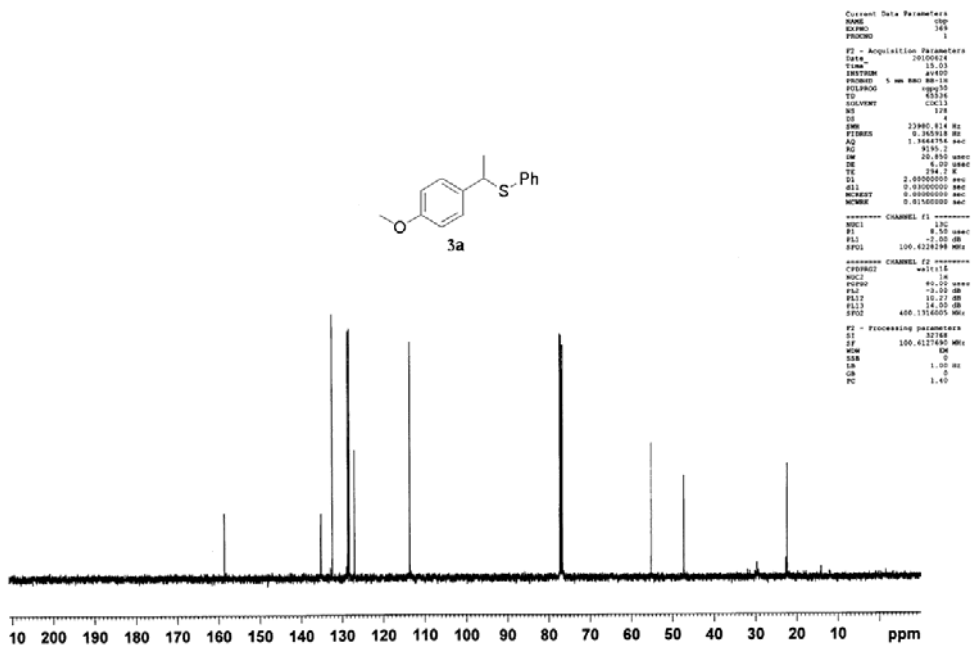

cbp-10-7-1-2

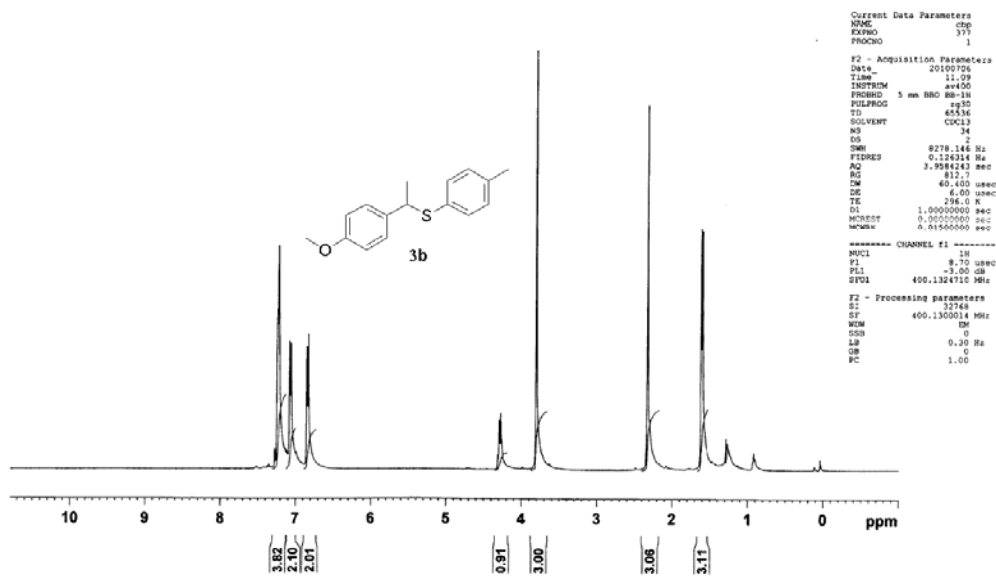

cbp-10-7-1-2

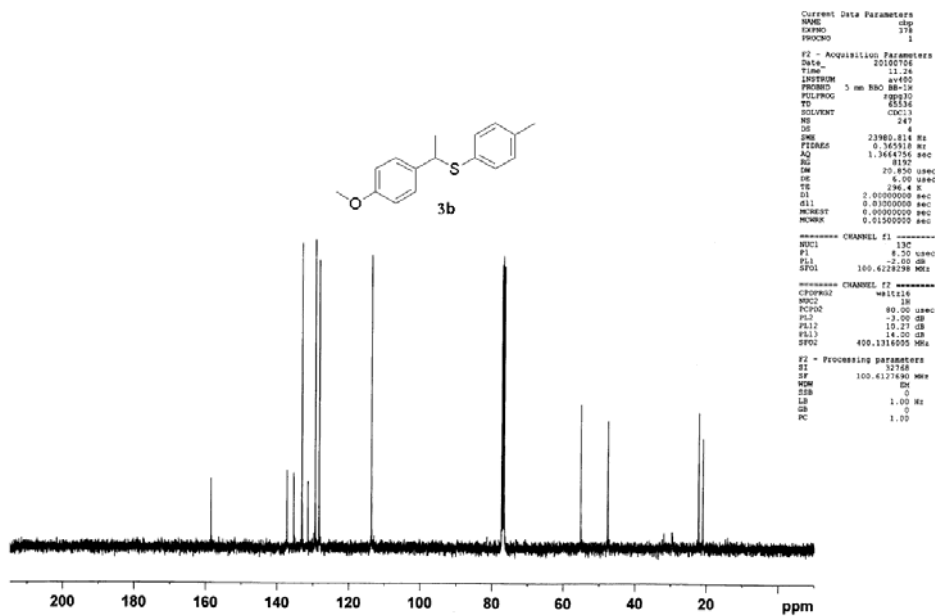

cbp-10-7-1-3

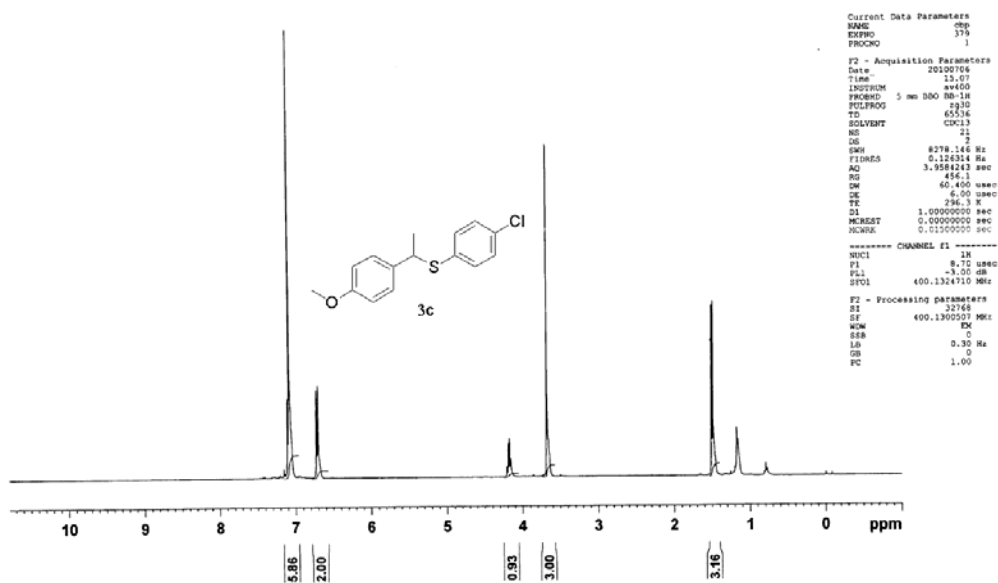

cbp-10-7-1-3

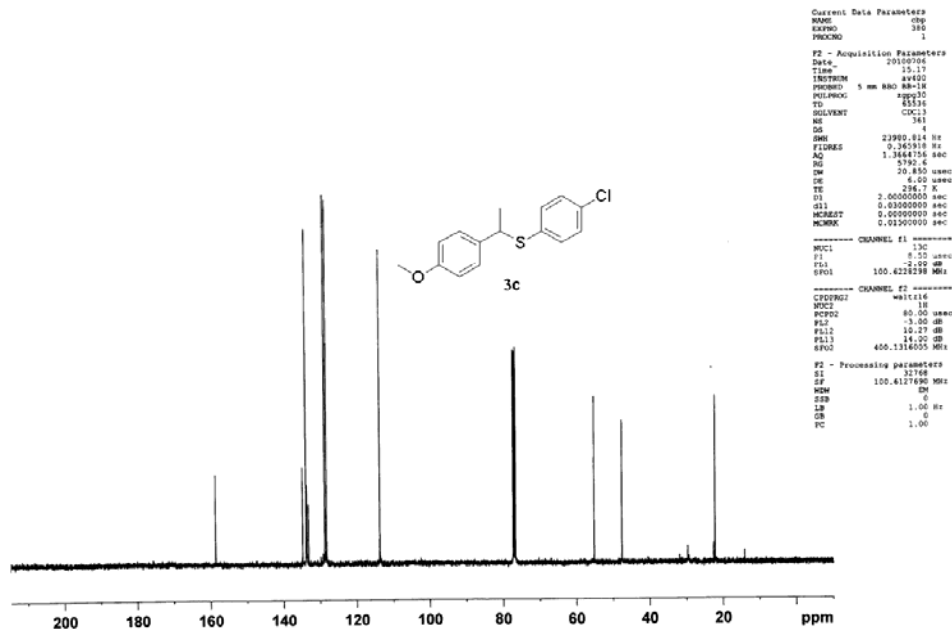

cbp-10-7-1-1

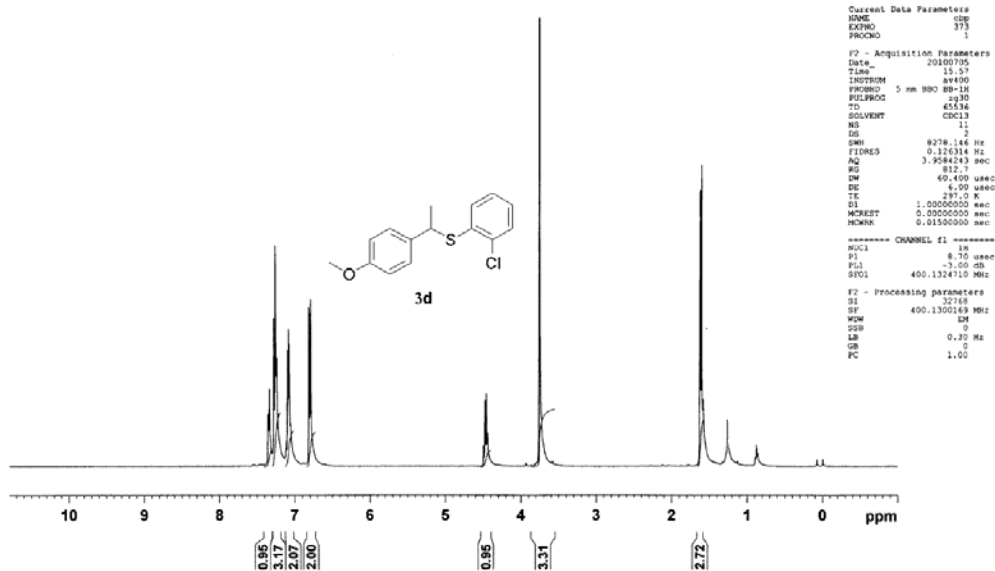

cbp-10-7-1-1

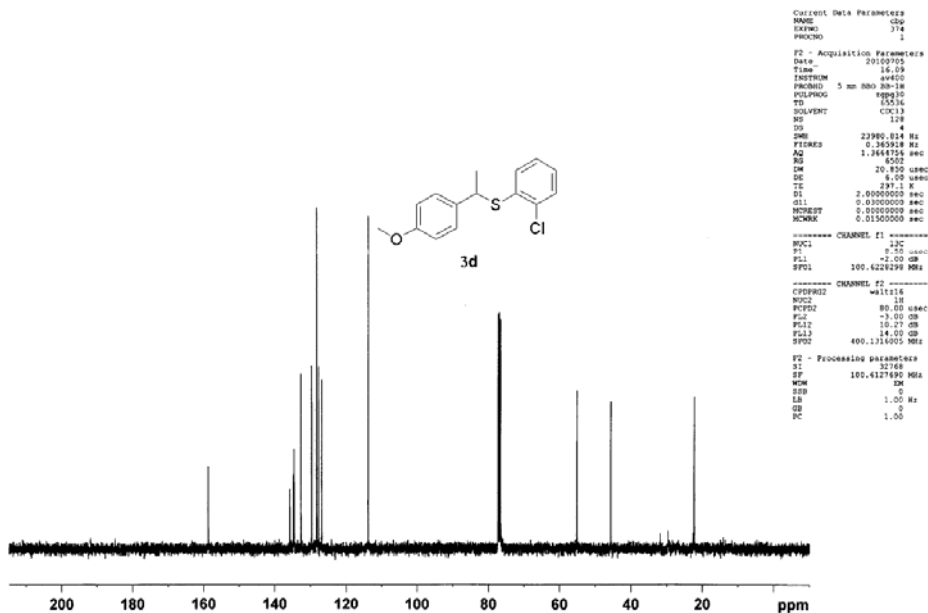

cbp-10-7-1-5

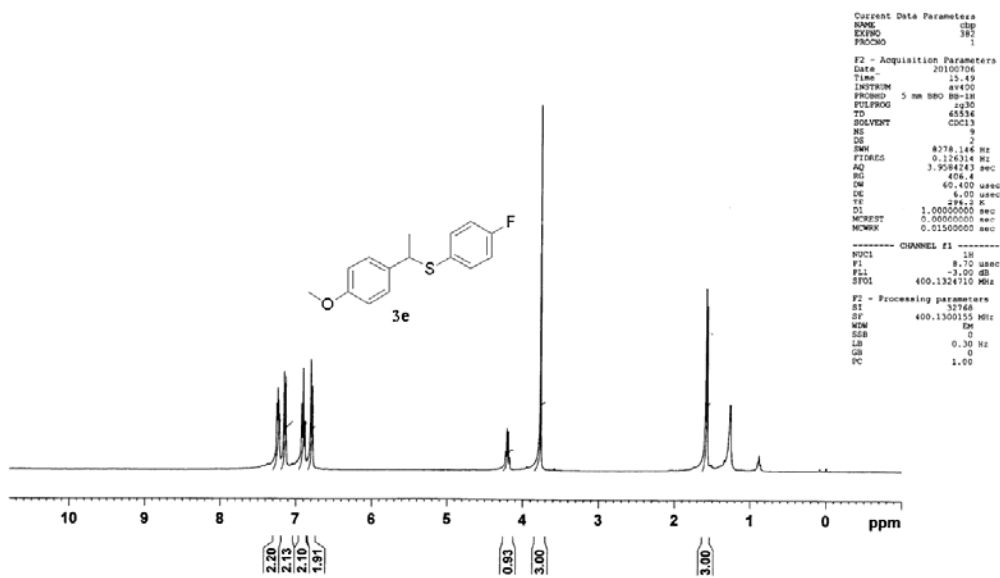

cbp-10-7-1-5

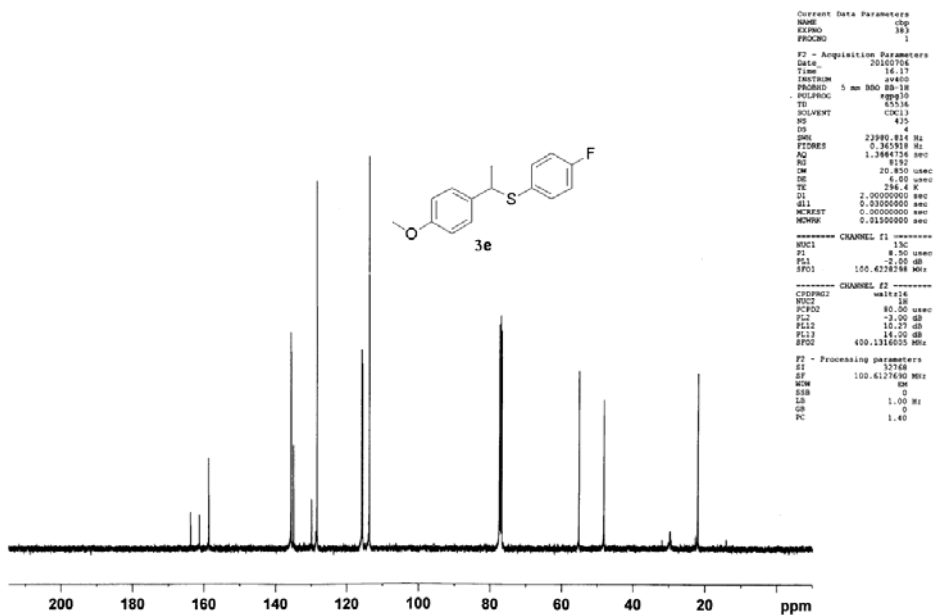

cbp100706-1

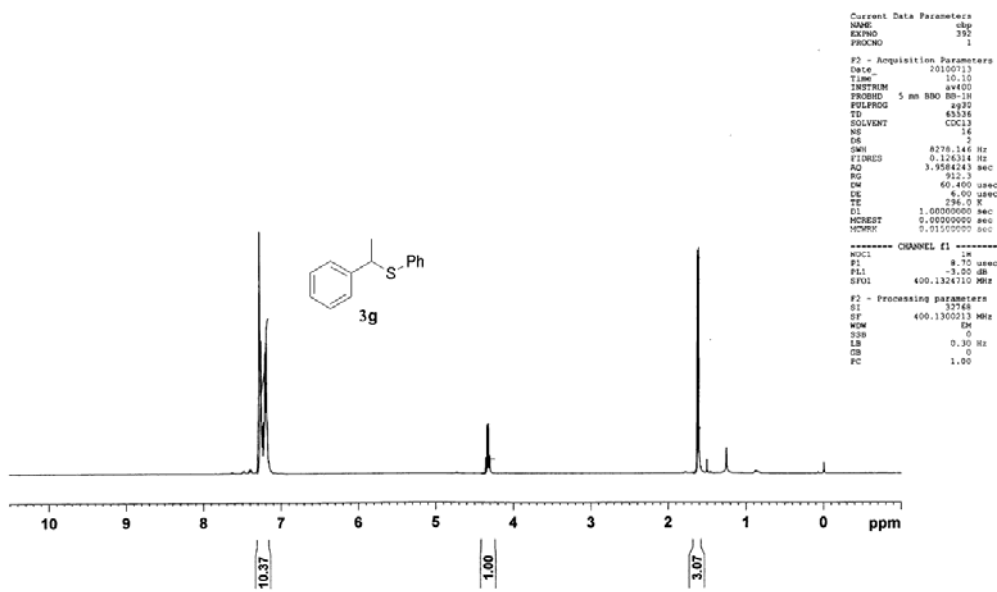

cbp100706-1 C

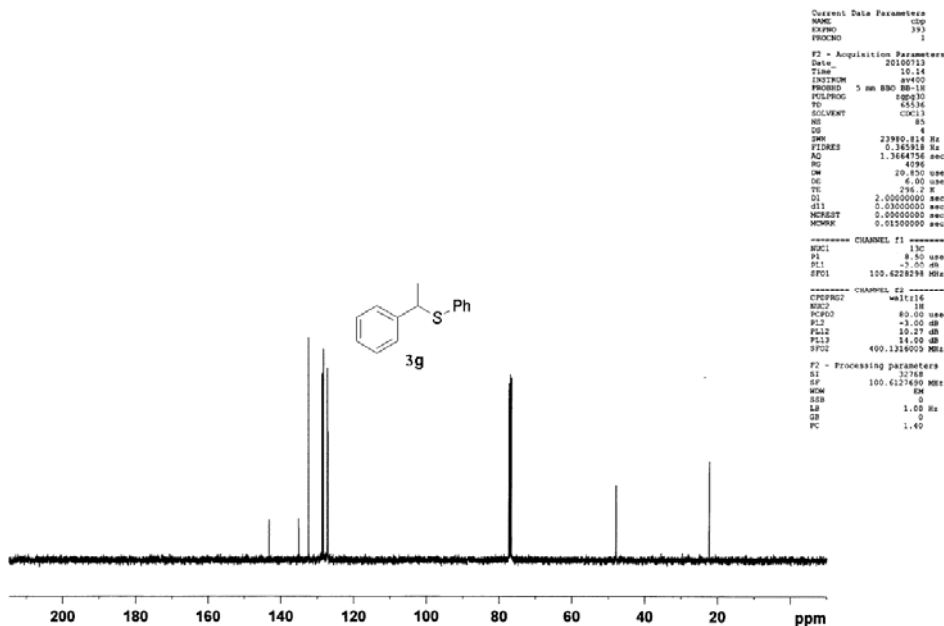

cbp100706-3

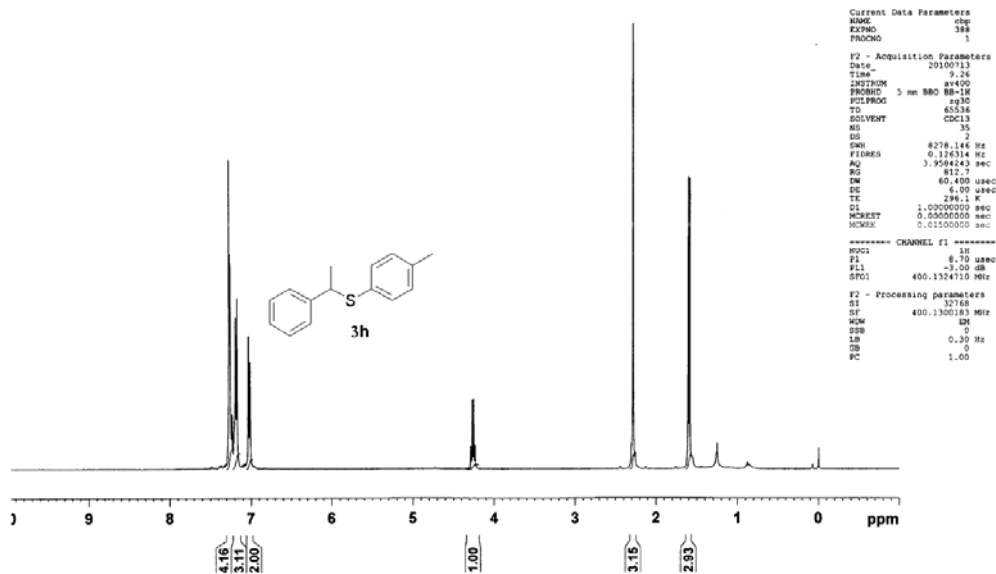

cbp100706-3 C

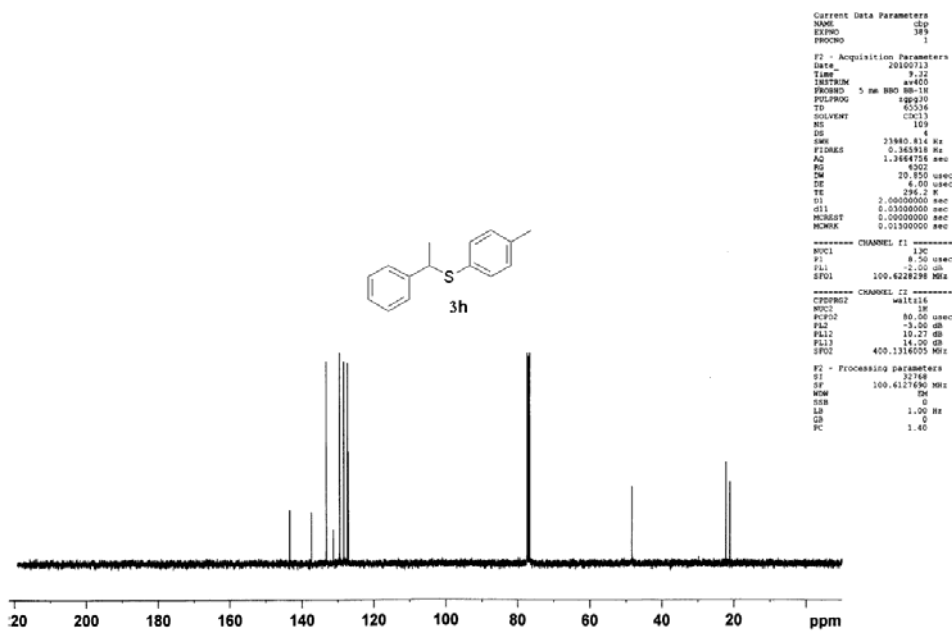

cbp100706-2

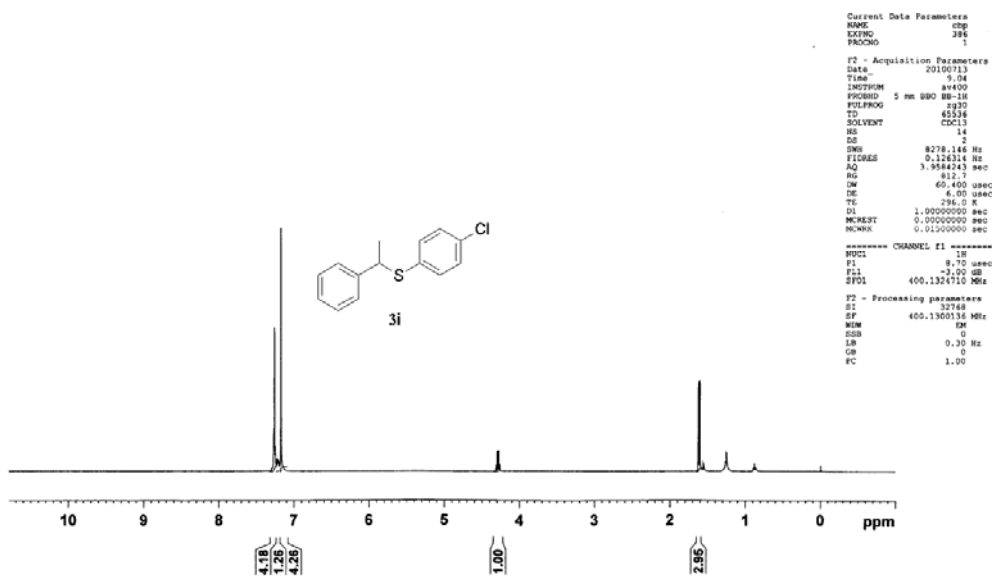

cbp100706-2 c

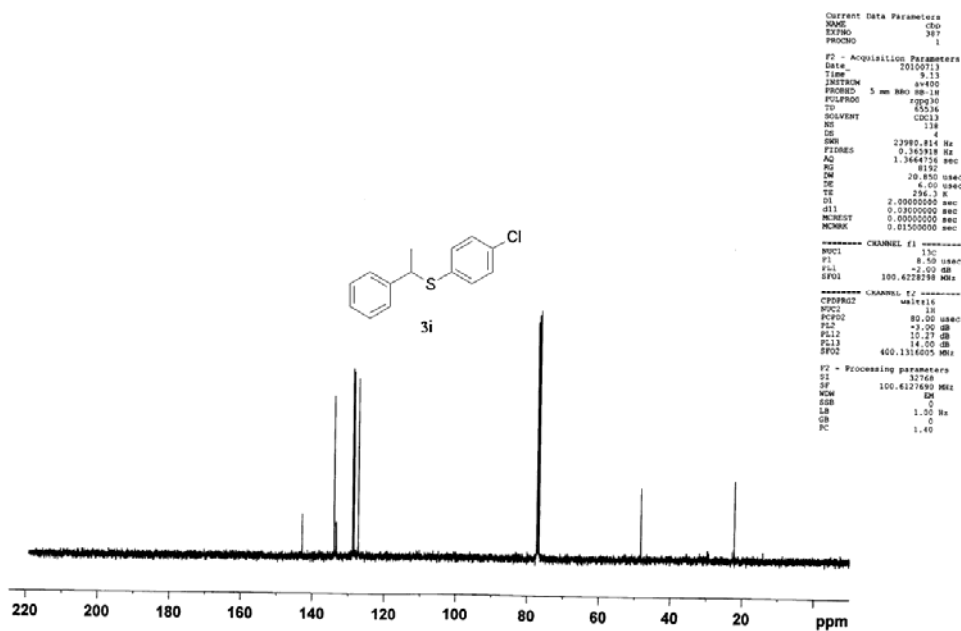



cbp1007-21-2-1

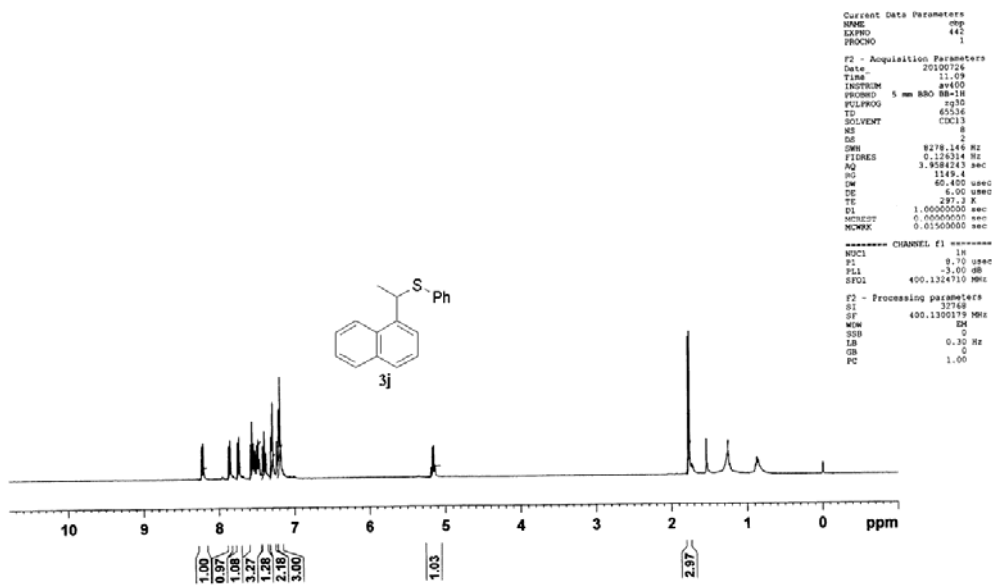

cbp1007-21-2-1

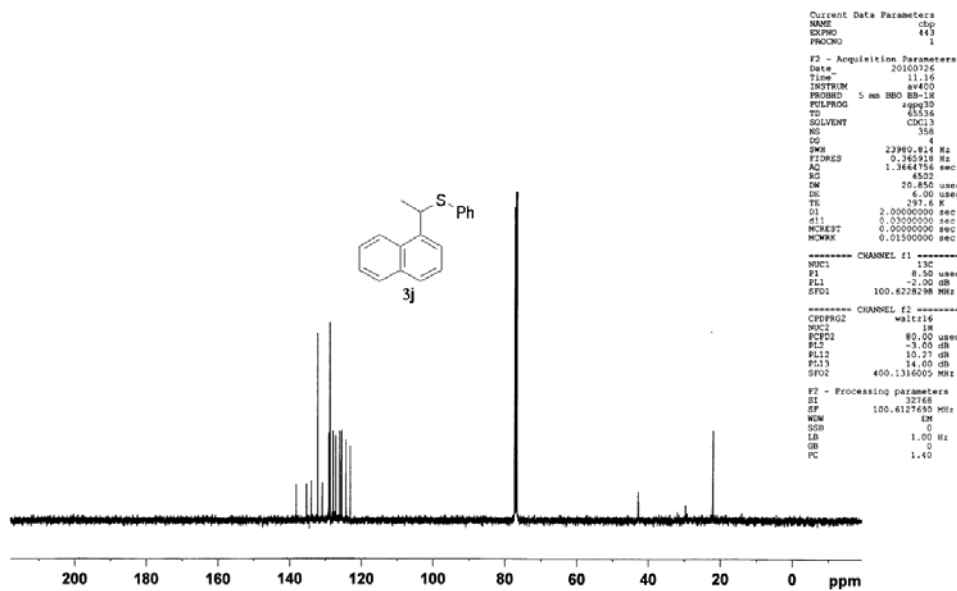

cbp100721-2-2

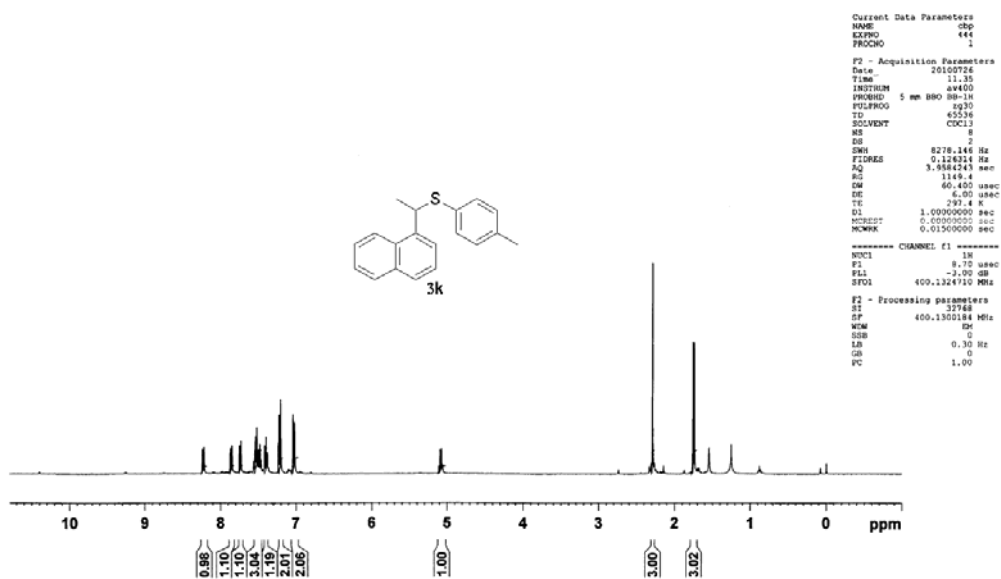

cbp100721-2-2

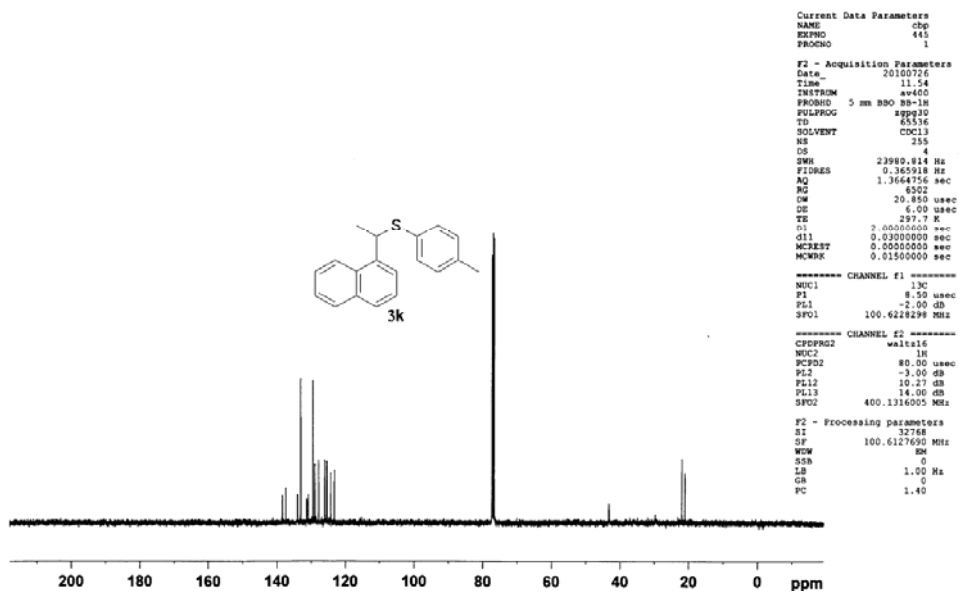

cbp100721-2-3

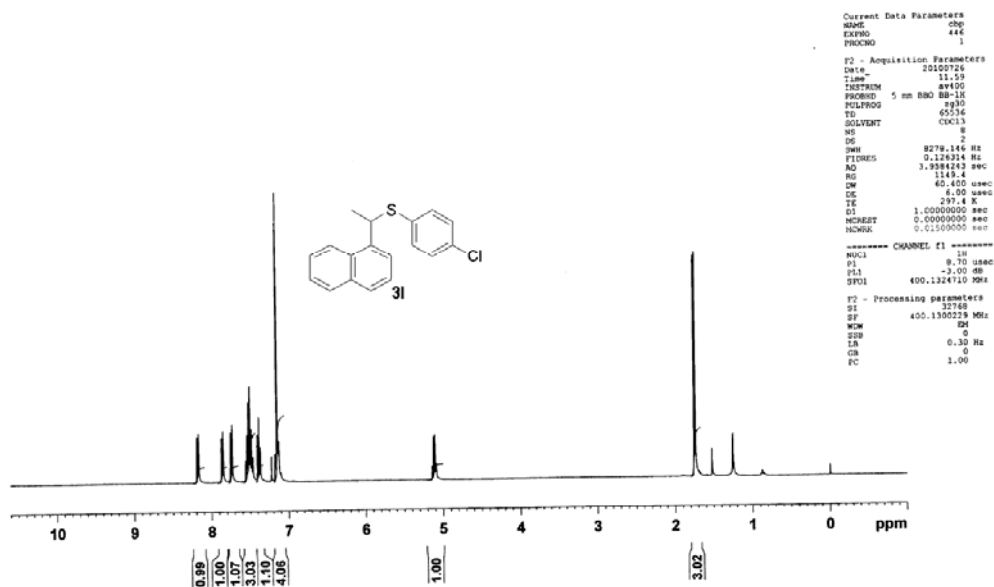

cbp100721-2-3

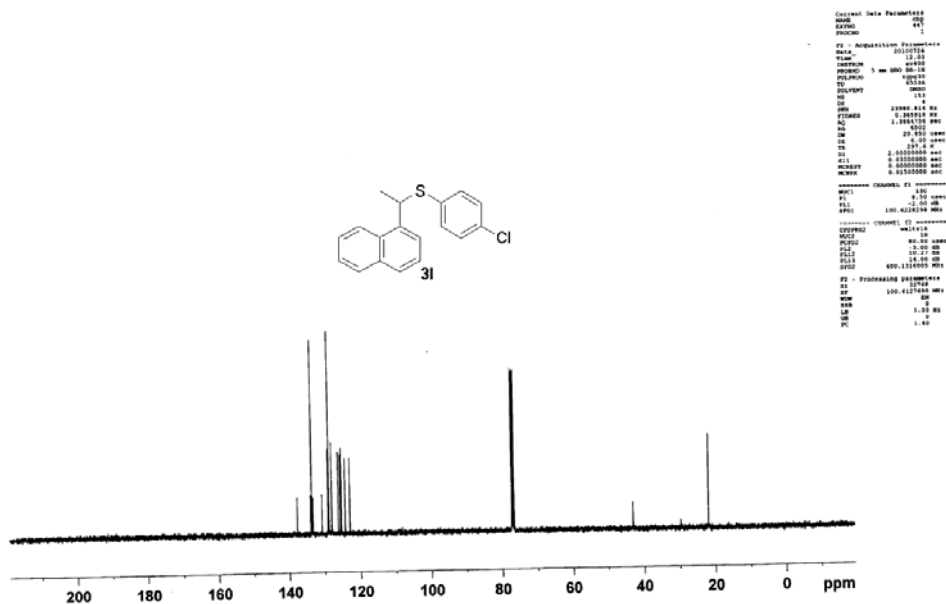

cbp100721-1-1

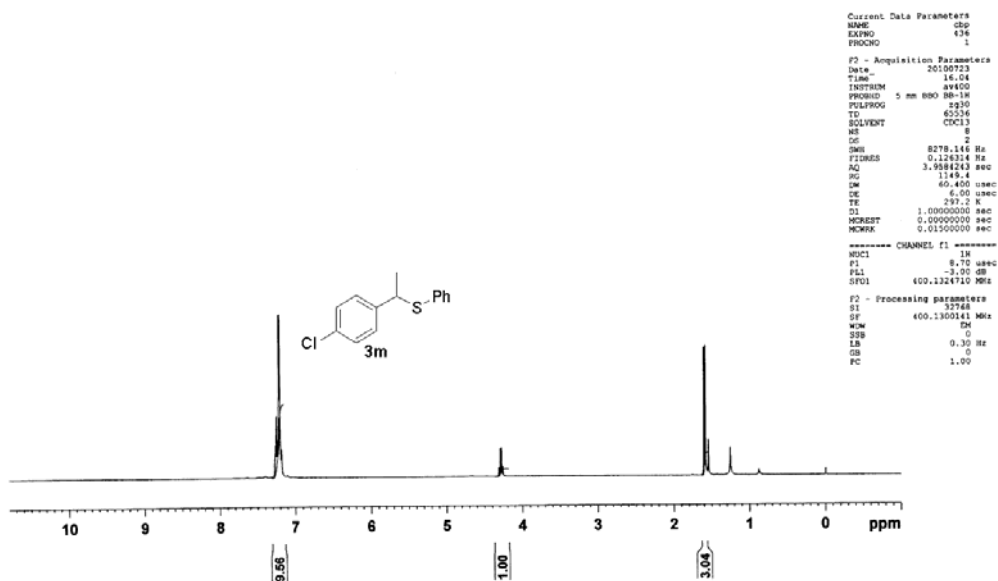

cbp100721-1-1

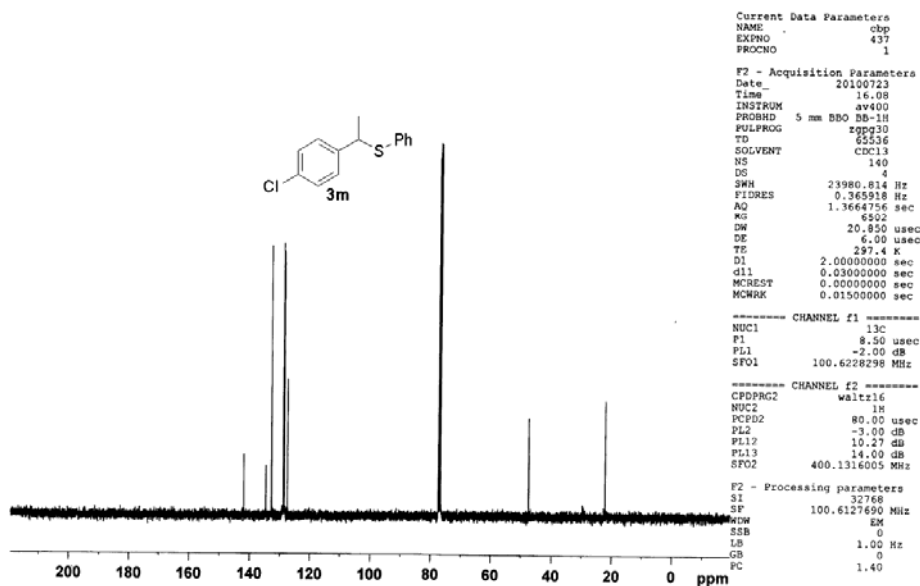

cbp100721-1-2

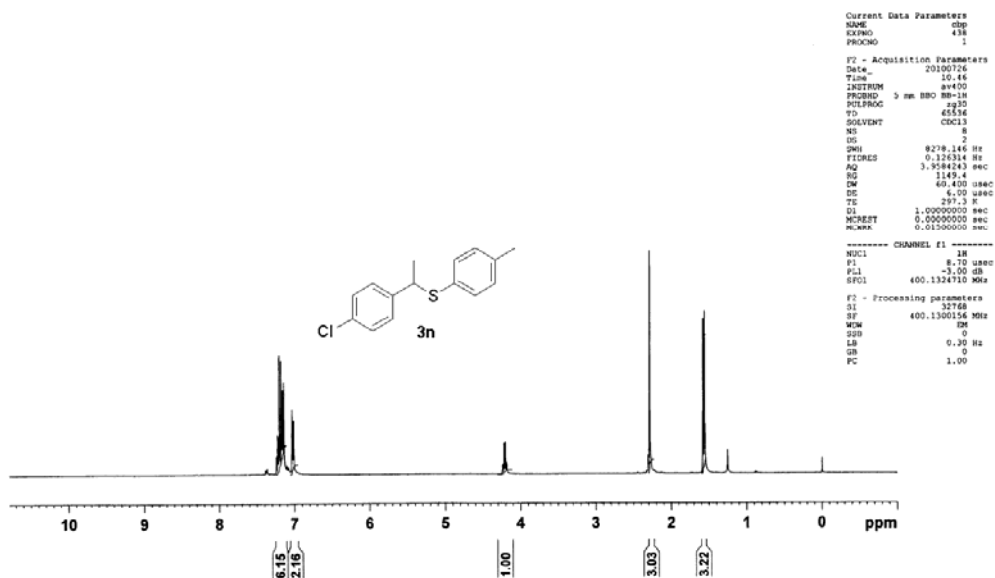

cbp100721-1-2

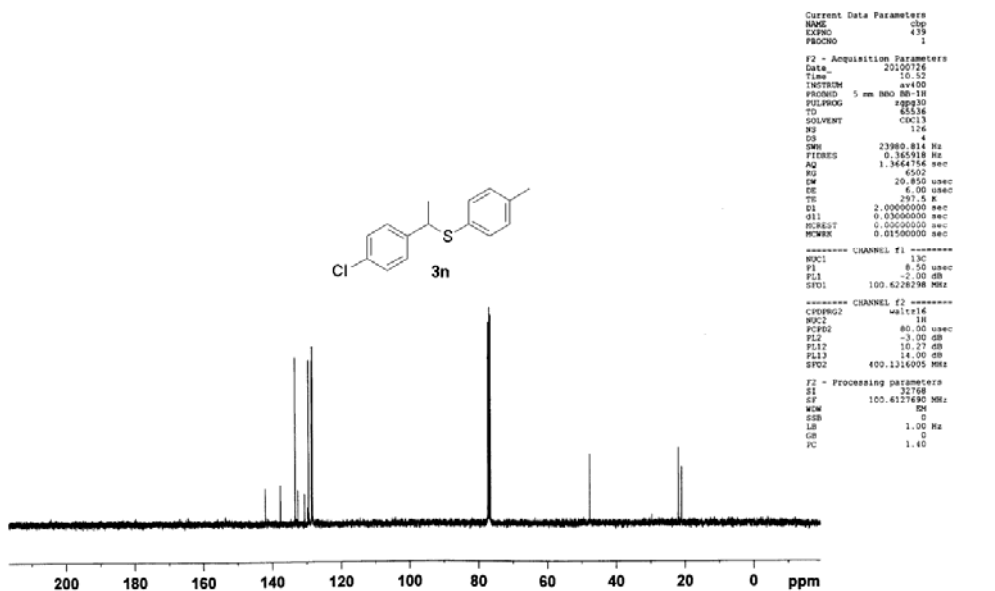

cbp100721-1-3

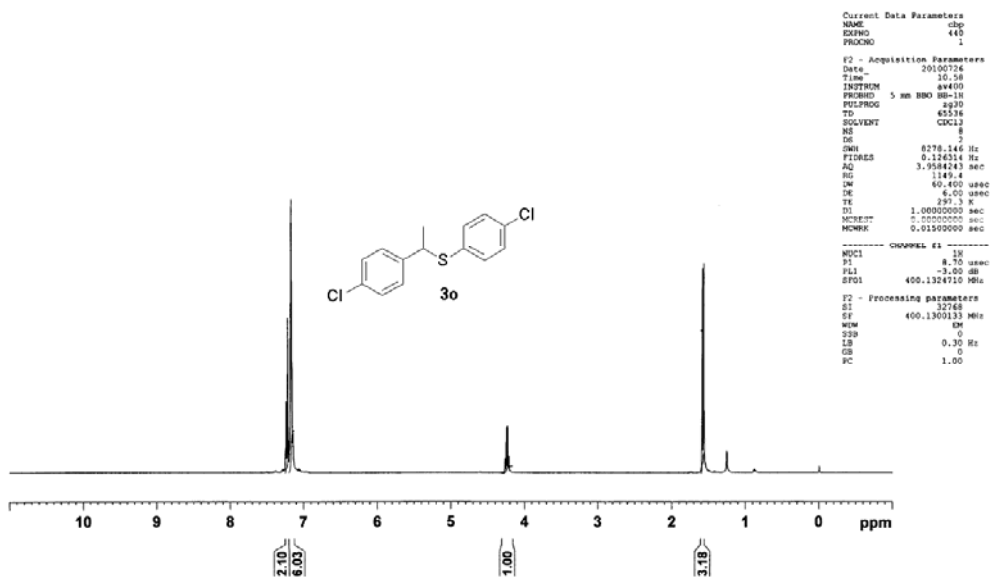

cbp100721-1-3

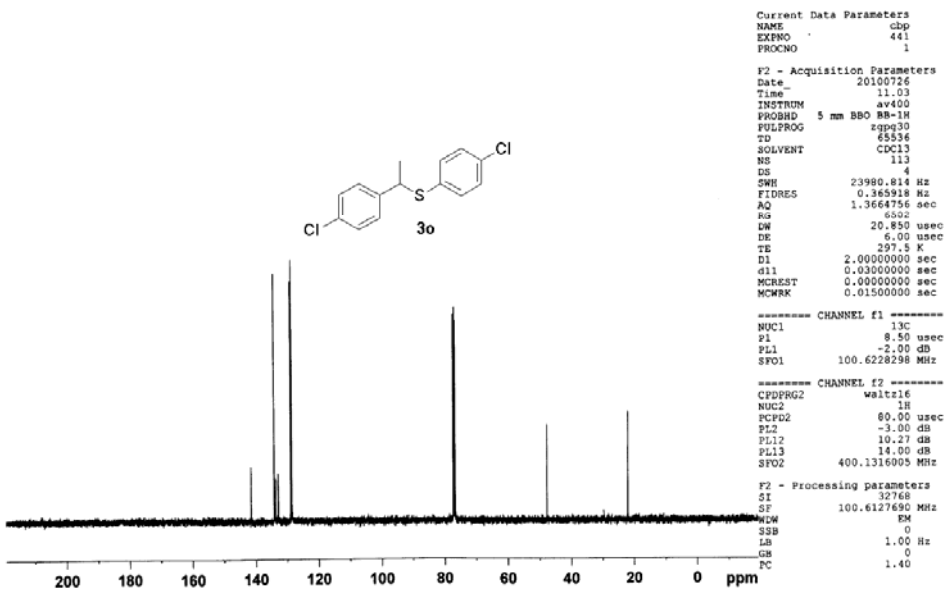

cbp100727-1

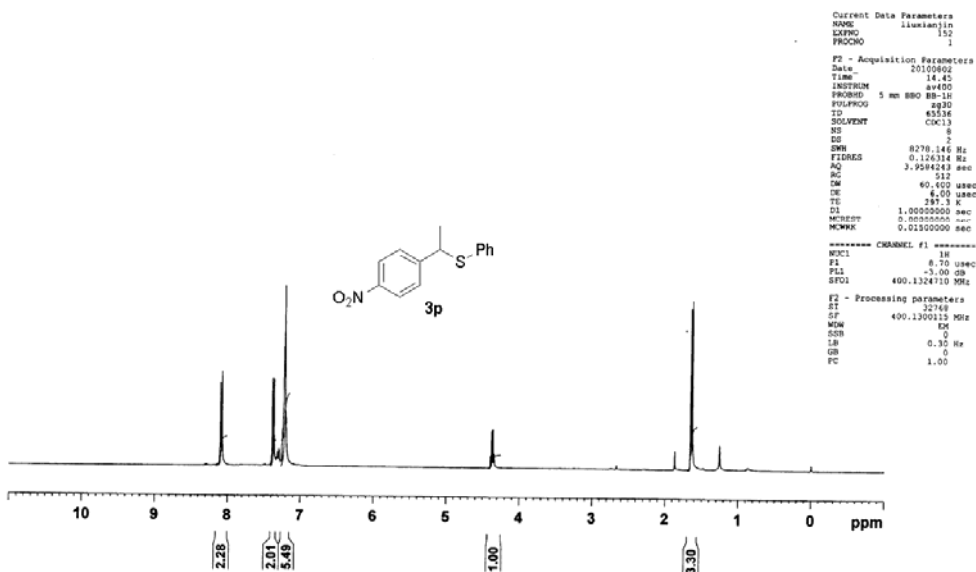

cbp100727-1

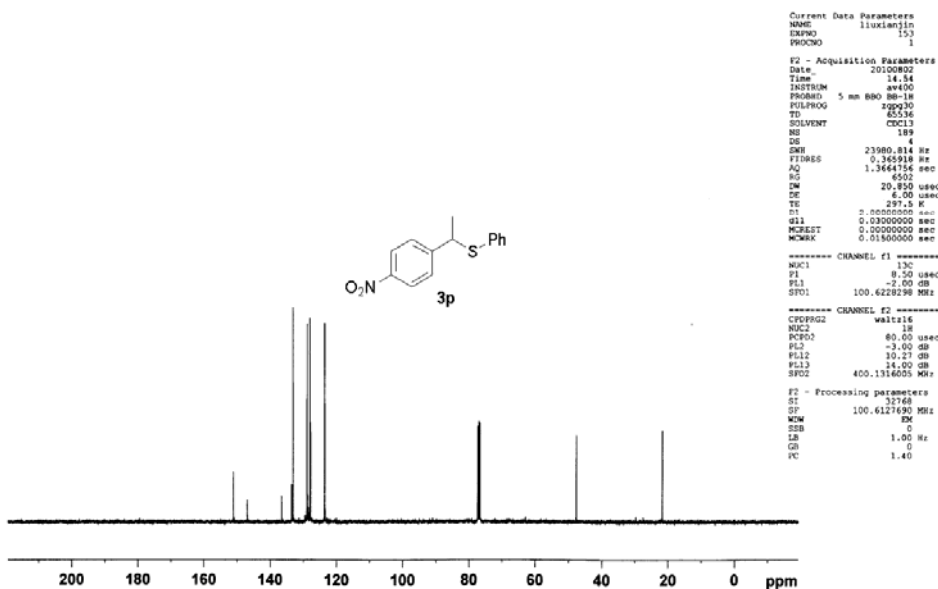

cbp100709-1

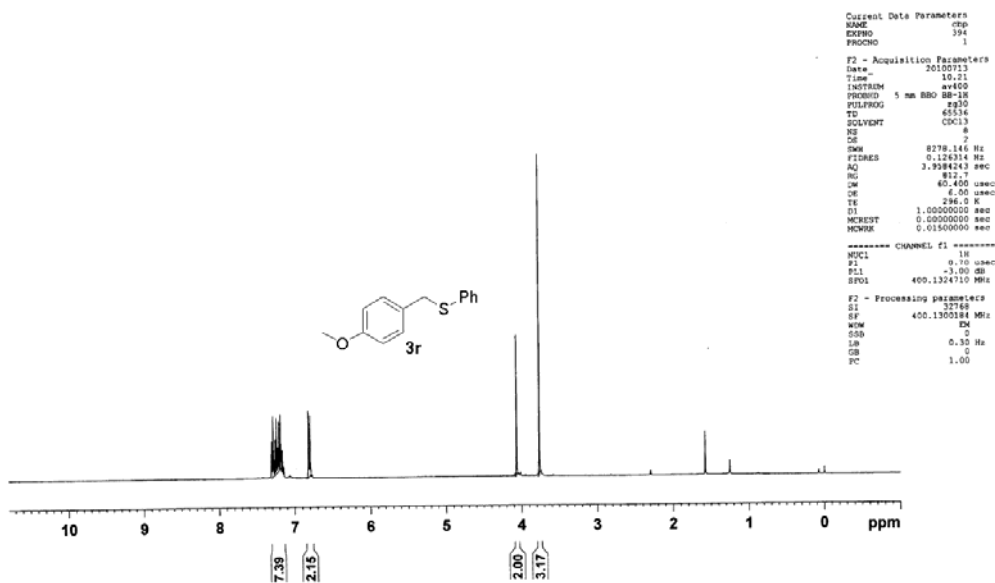

cbp100709-1 C

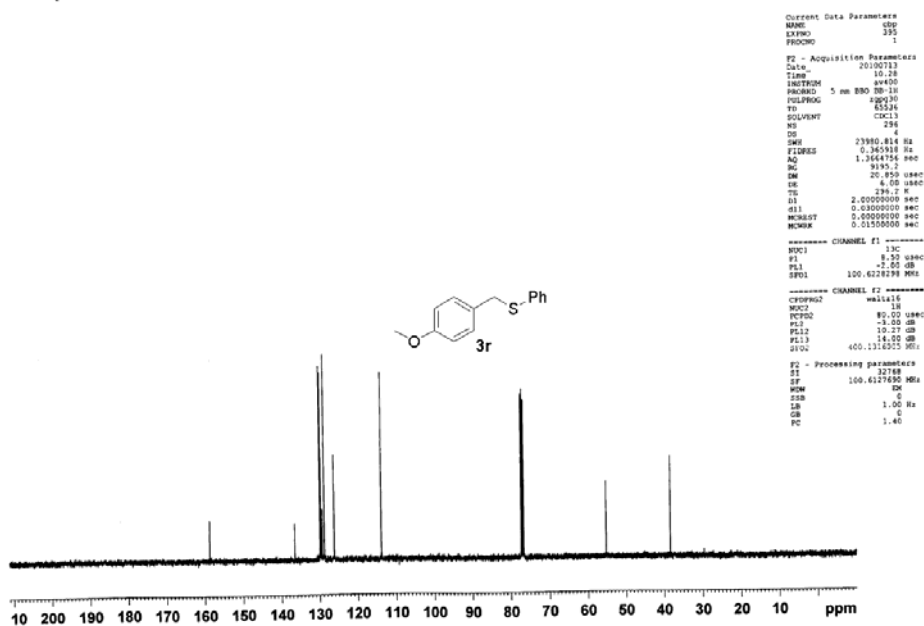



cbp100709-3

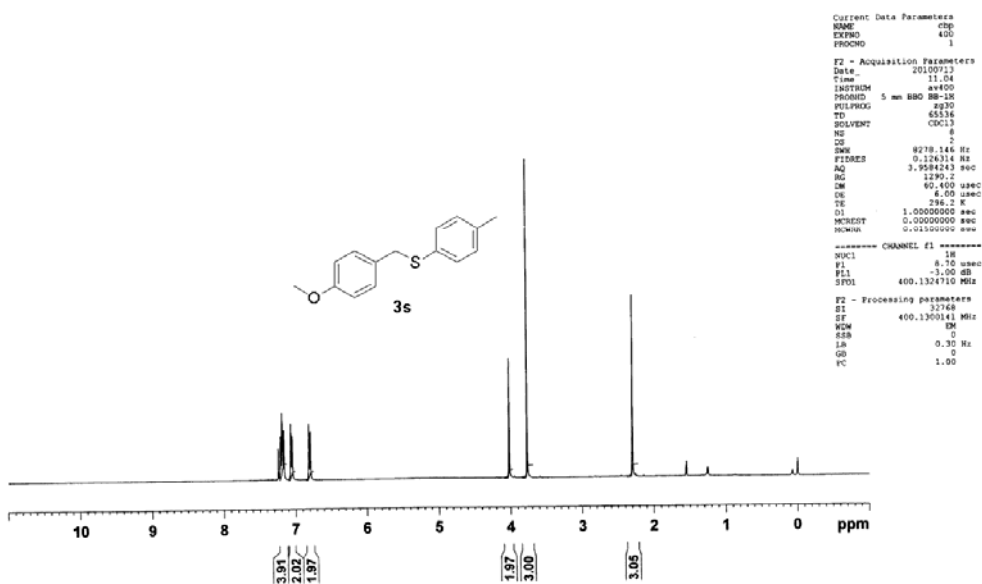

cbp100709-3 C

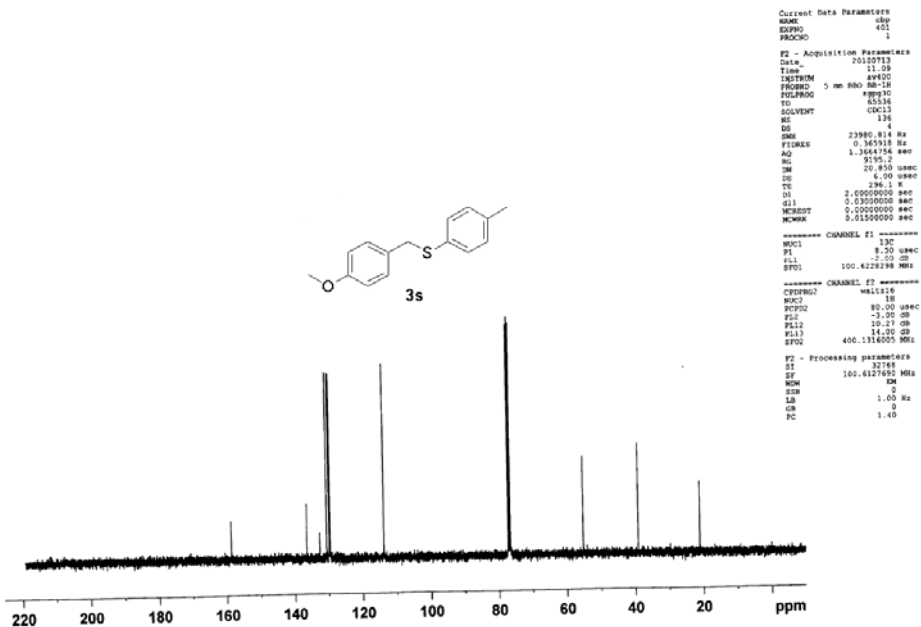

cbp100709-2

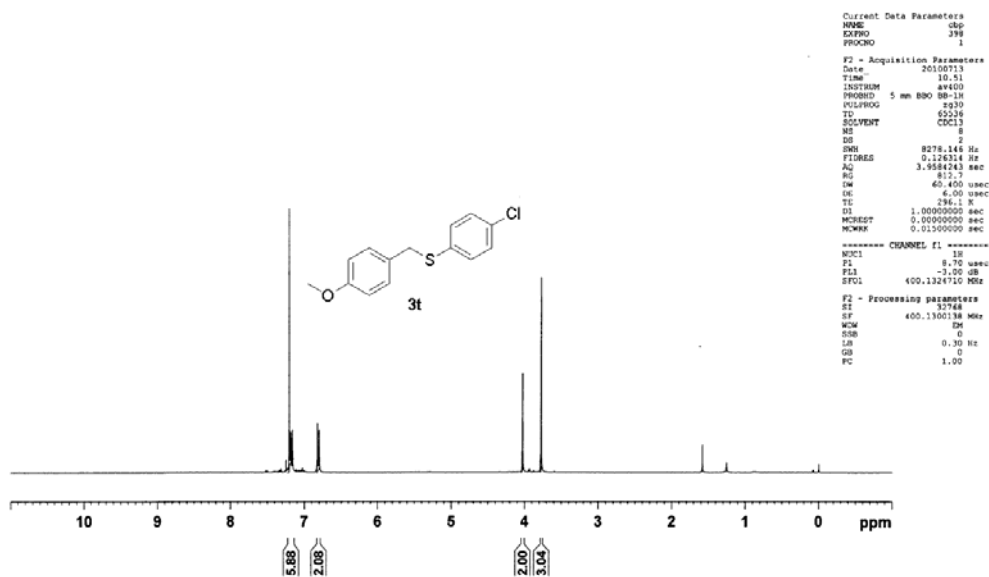

cbp100709-2C

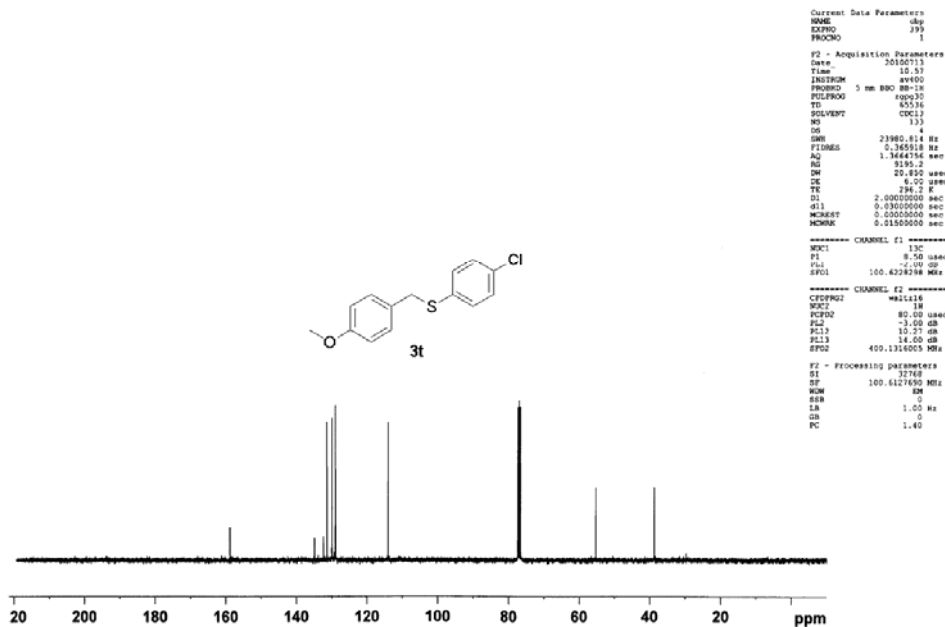

cbp0712-2-1

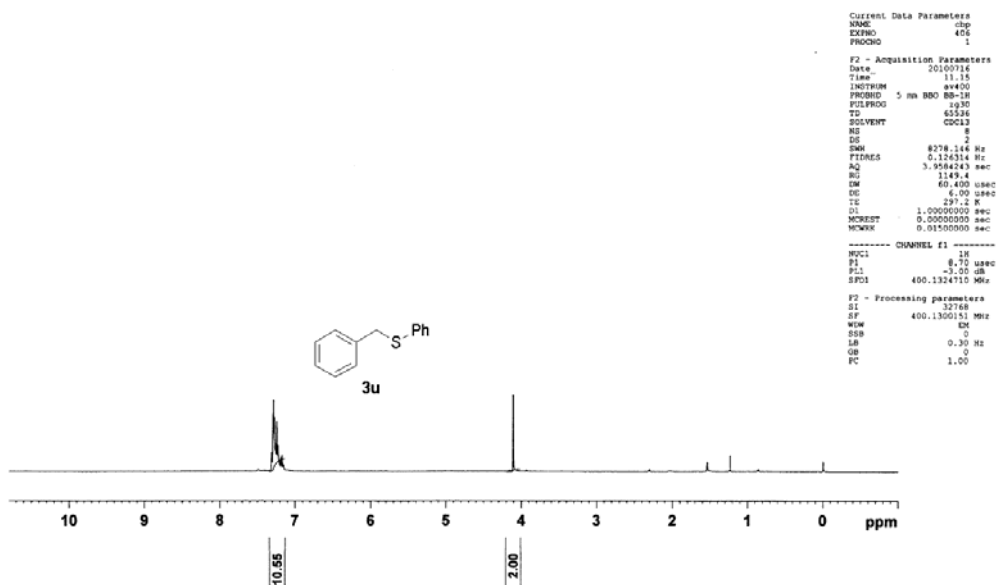

cbp0712-2-1

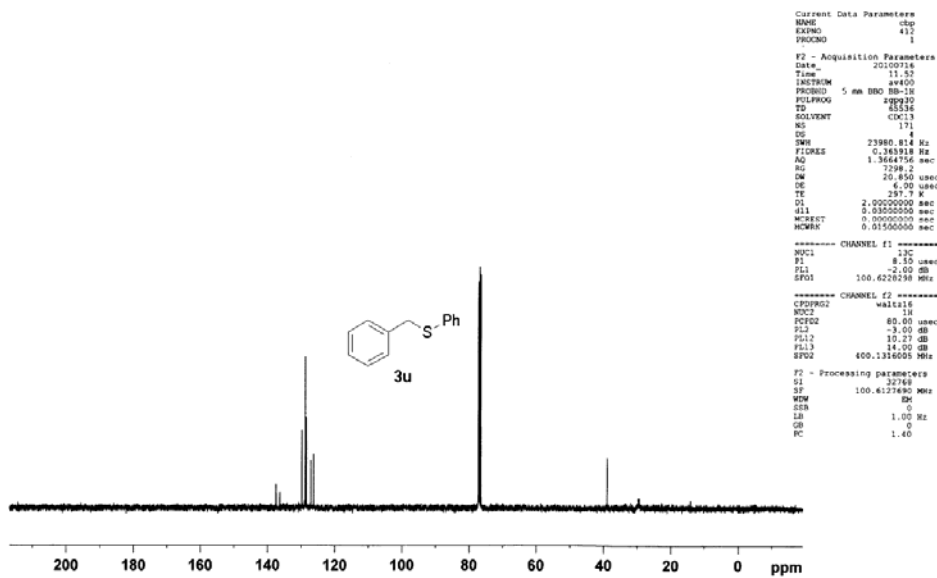

0712-2-2

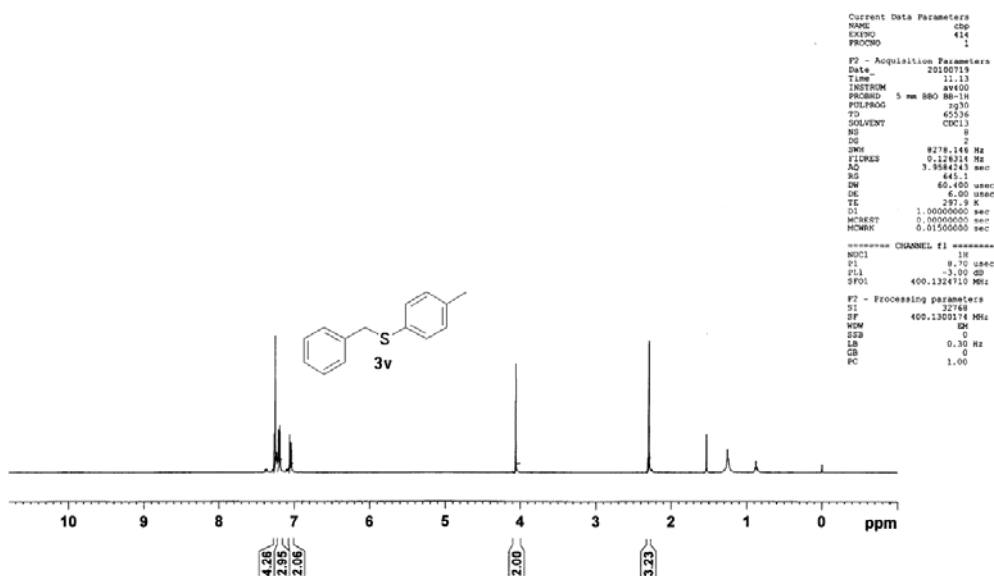

0712-2-2

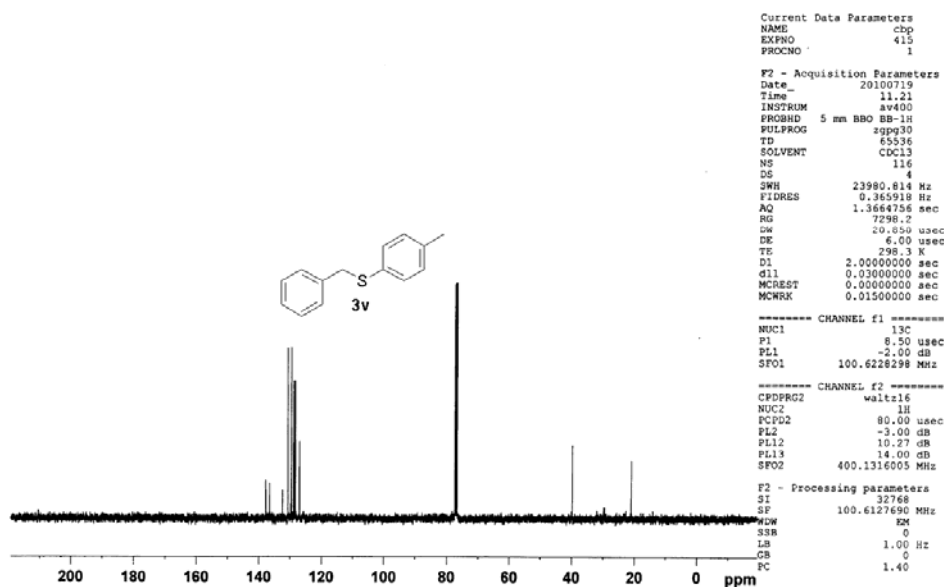

0712-2-3

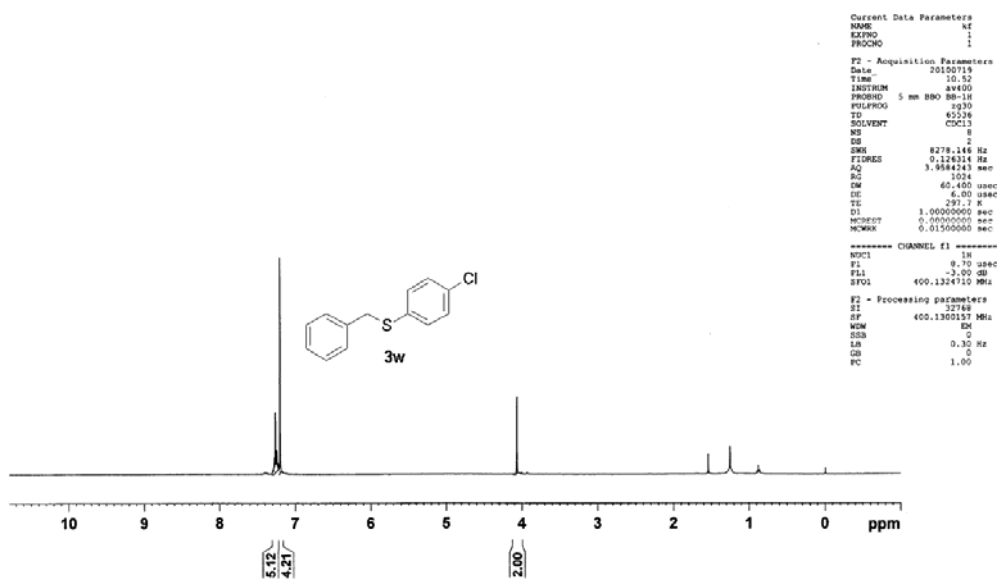

0712-2-3

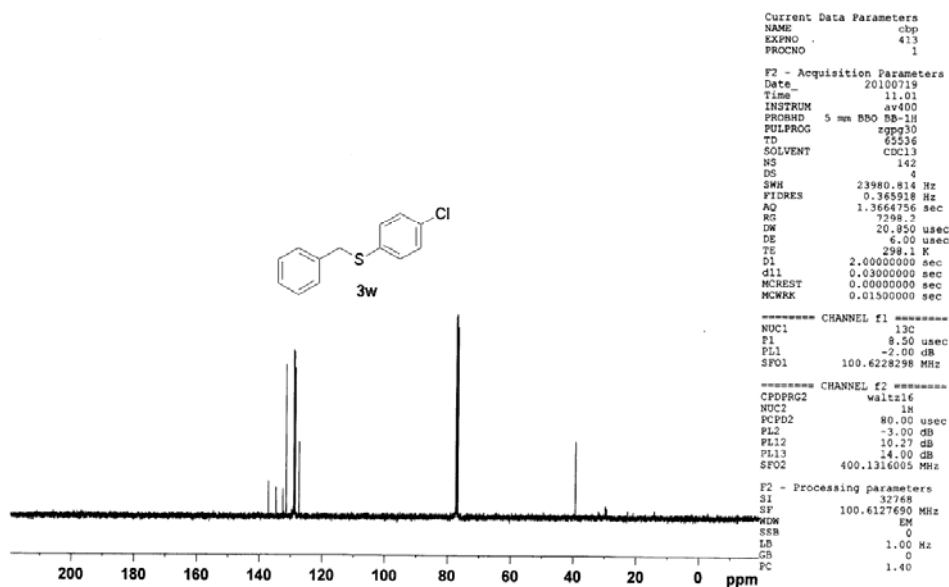

100805-2

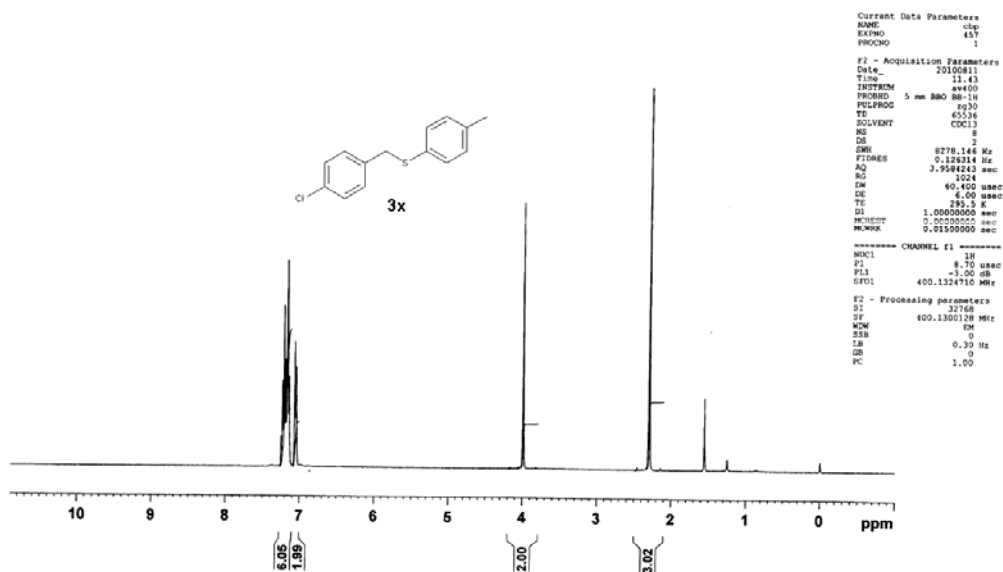

1008-5-2

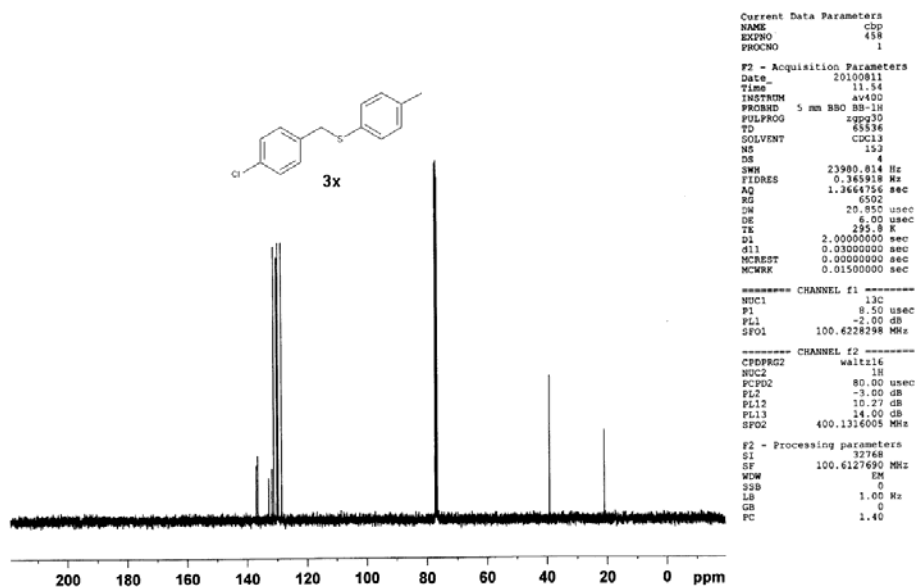

100805-3

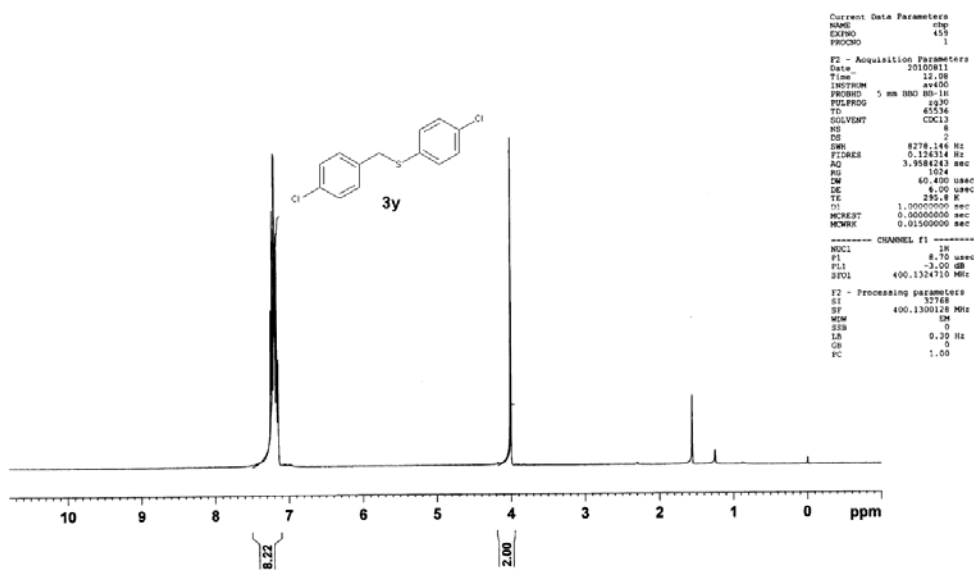

100805-3

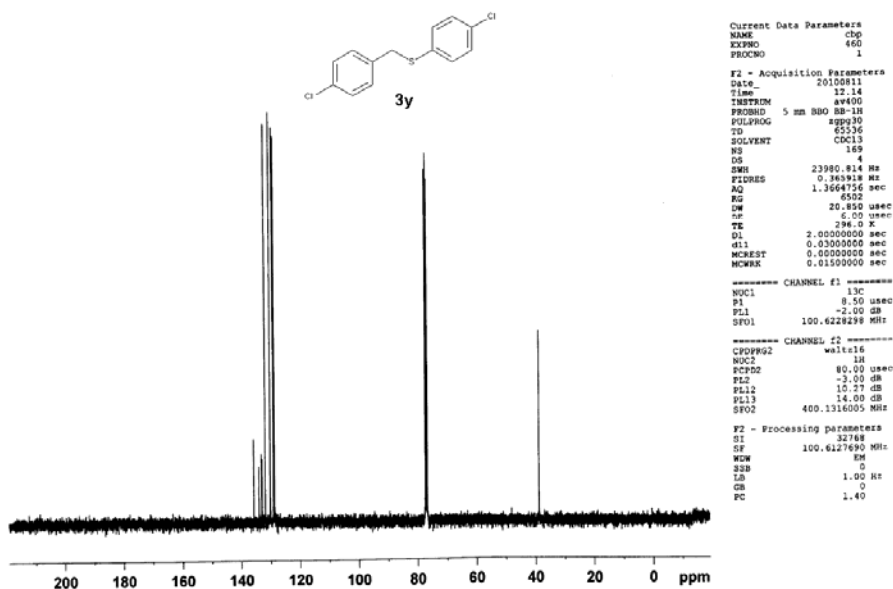

Supplement: c0ob00639d.pdf [file c0ob00639d.pdf]
